# Supplementary material for: Contrasting isotopic responses of dryland and wetland plants to a century of global anthropogenic changes in nutrient cycling
Source: Copernicus journal article supplement (doi:10.5194/egusphere-2025-5959), 2026-01-05
Supplement: Supplementary file 1 [file Table_S1_to_Supplement.xlsx]

## Sheet: Table_S1
Taxon	Pair code	Type of specimen	Year of collection	Latitude N	Longitude E	Δ15N (‰)	TN (%)	Δ13C - uncorrected (‰)	Δ13C - corrected (‰)	TC (%)	Share of farmland (in 10-km radius)
Alisma spp.	p0801	contemporary	2024	51.3098	21.905	5.16	4.1	-29.96	-29.96	43.88	0.54
Alisma spp.	p0801	historical	1927	51.3178	21.9542	4.33	2.72	-27.96	-29.57	42.21	-
Alisma spp.	p0802	contemporary	2024	52.6631	19.0695	12.77	3.98	-31.23	-31.23	40.85	0.37
Alisma spp.	p0802	historical	1905	52.6481	19.0675	4.76	3.73	-28.17	-29.88	39.61	-
Alisma spp.	p0803	contemporary	2024	53.3408	19.4285	2.45	4.49	-35.26	-35.26	41.51	0.48
Alisma spp.	p0803	historical	1931	53.3708	19.3586	7.77	3.75	-27.63	-29.23	47.36	-
Alisma spp.	p0804	contemporary	2024	52.5814	22.2913	-3.13	3.97	-29.16	-29.16	42.59	0.67
Alisma spp.	p0804	historical	1891	52.5767	22.2972	4	3.17	-26.74	-28.51	42.49	-
Alisma spp.	p0805	contemporary	2024	54.0348	23.1047	-0.14	3.15	-32.32	-32.32	40.78	0.32
Alisma spp.	p0805	historical	1921	54.0311	23.0939	3.13	1.88	-27.62	-29.23	42.55	-
Alisma spp.	p0806	contemporary	2024	51.3982	23.3128	8.45	4.07	-28.92	-28.92	41.9	0.63
Alisma spp.	p0806	historical	1905	51.3997	23.4042	2.48	4.49	-28.11	-29.82	43.52	-
Alisma spp.	p0807	contemporary	2024	52.0289	20.968	5.73	3.06	-31.64	-31.64	41.96	0.47
Alisma spp.	p0807	historical	1909	52.0811	21.0236	3.99	2.84	-27.68	-29.35	41.97	-
Alisma spp.	p0808	contemporary	2024	52.3288	20.9302	9.2	3.31	-28.42	-28.42	42.79	0.18
Alisma spp.	p0808	historical	1905	52.2469	21.0342	6.53	4.96	-26.65	-28.36	41.62	-
Arabis hirsuta	p0101	contemporary	2024	50.1899	19.8062	-3.23	2.73	-30.48	-30.48	40.96	0.68
Arabis hirsuta	p0101	historical	1905	50.2127	19.8322	-2.01	3.83	-26.48	-28.19	41.86	-
Arabis hirsuta	p0102	contemporary	2024	50.8008	19.205	4.33	1.93	-33	-33	41.51	0.47
Arabis hirsuta	p0102	historical	1875	50.8067	19.1533	0.84	2.34	-29.23	-31.05	37.81	-
Arabis hirsuta	p0103	contemporary	2024	50.7654	19.2705	-1.44	3.2	-30.98	-30.98	41.93	0.51
Arabis hirsuta	p0103	historical	1875	50.7772	19.2733	0.52	3.44	-29.19	-31.01	38.19	-
Arabis hirsuta	p0104	contemporary	2024	51.0831	20.92	-2.47	2.66	-30.96	-30.96	39.94	0.25
Arabis hirsuta	p0104	historical	1909	51.0475	20.8292	3.91	4.41	-29.14	-30.81	39.18	-
Arabis hirsuta	p0105	contemporary	2024	51.4361	23.4211	-3.31	1.98	-29.81	-29.81	40.7	0.39
Arabis hirsuta	p0105	historical	1891	51.3997	23.4042	3.92	3.65	-28.82	-30.59	40.15	-
Arabis hirsuta	p0106	contemporary	2024	50.7411	19.2726	-1.02	3.33	-32.19	-32.19	42.17	0.46
Arabis hirsuta	p0106	historical	1905	50.7503	19.2675	5.39	2.74	-27.99	-29.7	37.44	-
Arabis hirsuta	p0107	contemporary	2024	49.4362	20.1032	-3.23	3.04	-31.42	-31.42	42.74	0.6
Arabis hirsuta	p0107	historical	~1855	49.2992	19.9494	1.72	2.34	-29.5	-31.37	38.44	-
Cardamine amara	p0901	contemporary	2024	50.6878	19.4124	10.5	5.2	-30.59	-30.59	40.69	0.43
Cardamine amara	p0901	historical	1905	50.7067	19.4375	4.27	4.21	-27.28	-28.99	39.74	-
Cardamine amara	p0902	contemporary	2024	51.0133	16.0047	5.07	3.79	-32.26	-32.26	39.57	0.49
Cardamine amara	p0902	historical	1922	50.9033	15.7314	2.95	4.51	-27.61	-29.22	40.51	-
Cardamine amara	p0903	contemporary	2024	52.3269	20.8194	3.6	5.86	-34.24	-34.24	40.05	0.27
Cardamine amara	p0903	historical	1923	52.3275	20.8225	4.25	3.73	-28.78	-30.39	40.05	-
Cardamine amara	p0904	contemporary	2024	54.0293	22.9819	-0.1	3.94	-32.89	-32.89	38.08	0.41
Cardamine amara	p0904	historical	1921	54.0236	22.9811	12.28	2.86	-28.58	-30.19	40.22	-
Cardamine amara	p0905	contemporary	2024	52.2789	20.891	5.91	3.44	-33.04	-33.04	39.51	0.21
Cardamine amara	p0905	historical	1905	52.2944	20.9583	8.62	2.39	-28.01	-29.72	35.61	-
Cardamine amara	p0906	contemporary	2024	49.4163	20.1185	1.98	4.51	-34.22	-34.22	40.86	0.63
Cardamine amara	p0906	historical	1922	49.2667	19.8332	0.63	4.5	-27.84	-29.45	39.36	-
Cardamine amara	p8847	contemporary	2024	52.8489	19.2693	3.29	4.82	-33.92	-33.92	38.88	0.67
Cardamine amara	p8847	historical	1905	52.8439	19.1783	6.77	2.96	-29.7	-31.41	40.67	-
Carex caryophyllea	p0201	contemporary	2024	50.3077	19.5682	-2.49	1.99	-28.68	-28.68	43.86	0.33
Carex caryophyllea	p0201	historical	1905	50.3406	19.5239	-3.19	2.44	-27.02	-28.73	44.63	-
Carex caryophyllea	p0202	contemporary	2024	52.3159	20.7515	-3.06	2.21	-29.16	-29.16	45.08	0.41
Carex caryophyllea	p0202	historical	1924	52.3039	20.7756	-0.69	3.08	-28.57	-30.18	43.26	-
Carex caryophyllea	p0203	contemporary	2024	51.3108	21.9107	-2.85	2.23	-29.51	-29.51	43.52	0.54
Carex caryophyllea	p0203	historical	1905	51.3178	21.9542	-1.36	3.25	-28.95	-30.66	42.91	-
Carex caryophyllea	p0204	contemporary	2024	52.6645	19.1254	-3.63	2.69	-29.87	-29.87	42.02	0.43
Carex caryophyllea	p0204	historical	1905	52.6733	19.0719	-0.52	2.87	-26.27	-27.98	42.43	-
Carex caryophyllea	p0205	contemporary	2024	51.2133	23.3617	-2.41	2.35	-29.54	-29.54	43.5	0.78
Carex caryophyllea	p0205	historical	1905	51.3997	23.4042	1.15	1.26	-26.96	-28.67	44.28	-
Carex caryophyllea	p0206	contemporary	2024	52.6084	19.1193	-6.35	1.92	-30.58	-30.58	44.43	0.41
Carex caryophyllea	p0206	historical	1905	52.6039	19.1197	-1.61	3.59	-29.57	-31.28	44.73	-
Carex caryophyllea	p0207	contemporary	2024	53.3535	14.5929	-4.9	1.91	-29.17	-29.17	43.44	0.39
Carex caryophyllea	p0207	historical	1906	53.4283	14.5528	-2.04	3.2	-28.74	-30.44	45.93	-
Carex flacca	p0301	contemporary	2024	49.4036	20.4135	0.99	2.06	-28.64	-28.64	44.07	0.24
Carex flacca	p0301	historical	1926	49.4192	20.3861	3.11	1.52	-28.71	-30.32	43.82	-
Carex flacca	p0302	contemporary	2024	49.5626	19.7308	2.9	1.87	-31.55	-31.55	43.33	0.46
Carex flacca	p0302	historical	1881	49.2647	19.9414	1.28	2.47	-28.37	-30.18	45.44	-
Carex flacca	p0303	contemporary	2024	50.7779	19.2677	-3.08	1.87	-28.99	-28.99	43.41	0.53
Carex flacca	p0303	historical	1905	50.7503	19.2675	4.1	1.47	-26.24	-27.95	42.98	-
Carex flacca	p0304	contemporary	2024	52.5373	19.2517	-3.95	2.01	-30.65	-30.65	44.45	0.45
Carex flacca	p0304	historical	1905	52.6481	19.0675	-0.11	3.51	-28.63	-30.34	45.83	-
Carex flacca	p0305	contemporary	2024	51.2152	23.3603	2.13	2.23	-28.06	-28.06	45.02	0.78
Carex flacca	p0305	historical	~1885	51.3206	23.3211	2.43	3.23	-27.8	-29.6	44.89	-
Carex paniculata	p1002	contemporary	2024	52.2311	21.1315	8.54	2.77	-33.67	-33.67	44.33	0.1
Carex paniculata	p1002	historical	1905	52.2294	21.0122	11.48	3.2	-26.82	-28.53	40.86	-
Carex paniculata	p1005	contemporary	2024	50.7296	19.1836	3.3	2.28	-26.7	-26.7	43.84	0.37
Carex paniculata	p1005	historical	1879	50.8117	19.1203	0.95	2.6	-26.53	-28.34	43.13	-
Carex paniculata	p1006	contemporary	2024	49.4343	20.4767	0.74	2.43	-28.05	-28.05	43.39	0.2
Carex paniculata	p1006	historical	1889	49.4228	20.4828	0.12	2.06	-26.16	-27.94	43.32	-
Carex paniculata	p1007	contemporary	2024	52.452	19.6366	2.91	1.75	-30.52	-30.52	42.53	0.47
Carex paniculata	p1007	historical	1891	52.4603	19.6281	4.36	2.82	-25.72	-27.49	44.58	-
Carex praecox	p0401	contemporary	2024	53.2347	21.8737	-2.73	2.09	-29.77	-29.77	44.83	0.63
Carex praecox	p0401	historical	1938	53.2264	21.8789	-0.8	3.03	-25.28	-26.84	43.55	-
Carex praecox	p0402	contemporary	2024	52.3286	20.2555	1.43	3.09	-29.96	-29.96	44.32	0.59
Carex praecox	p0402	historical	1922	52.2978	20.28	0.71	2.67	-27.08	-28.69	43.47	-
Carex praecox	p0403	contemporary	2024	52.6651	19.1388	-0.25	2.67	-29.6	-29.6	43.7	0.45
Carex praecox	p0403	historical	1922	52.6733	19.0719	2.46	3.18	-26.17	-27.78	43.19	-
Carex praecox	p0404	contemporary	2024	51.4004	21.983	-2.47	2.21	-30.01	-30.01	44.4	0.47
Carex praecox	p0404	historical	1899	51.4164	21.9692	1.85	3.03	-27.58	-29.32	43.22	-
Carex praecox	p0405	contemporary	2024	50.3921	20.9294	-3.26	1.83	-28.79	-28.79	43.87	0.83
Carex praecox	p0405	historical	1875	50.3903	20.8997	-0.21	2.07	-26.59	-28.41	49.2	-
Carex praecox	p0406	contemporary	2024	52.3914	20.4292	1.61	1.67	-29.71	-29.71	43.64	0.56
Carex praecox	p0406	historical	1922	52.3864	20.5883	0.35	4.19	-26.37	-27.98	45.22	-
Carex praecox	p0407	contemporary	2024	52.2236	21.1218	-1.99	2.11	-28.52	-28.52	42.54	0.11
Carex praecox	p0407	historical	1869	52.2294	21.0122	5.36	3.89	-28.3	-30.13	43.39	-
Carex praecox	p0408	contemporary	2024	52.3101	20.7612	-2.42	3.27	-30.84	-30.84	44.46	0.4
Carex praecox	p0408	historical	1923	52.2897	20.5686	0.84	3	-27.37	-28.98	45.07	-
Dianthus carthusianorum	p0501	contemporary	2024	52.6646	19.1374	-2.36	2.35	-28.77	-28.77	43.85	0.45
Dianthus carthusianorum	p0501	historical	1922	52.6481	19.0675	-1.73	2.7	-27.19	-28.8	42	-
Dianthus carthusianorum	p0502	contemporary	2024	50.3077	19.5682	-4.08	2.59	-30.22	-30.22	45.54	0.33
Dianthus carthusianorum	p0502	historical	1922	50.3356	19.5625	2.49	1.22	-24.89	-26.5	43.45	-
Dianthus carthusianorum	p0503	contemporary	2024	51.158	21.7792	-5.92	2.87	-30.65	-30.65	44.58	0.61
Dianthus carthusianorum	p0503	historical	1906	51.4025	21.1469	-1.87	2.09	-27.04	-28.74	45.53	-
Dianthus carthusianorum	p0504	contemporary	2024	52.3159	20.7515	-2.46	3.73	-29.71	-29.71	45.04	0.41
Dianthus carthusianorum	p0504	historical	1905	52.3203	20.8636	-1.59	2.92	-27.61	-29.32	42.66	-
Dianthus carthusianorum	p0505	contemporary	2024	50.9649	21.0116	-3.36	2.45	-29.56	-29.56	44.08	0.49
Dianthus carthusianorum	p0505	historical	1897	50.9408	20.9569	1.2	2.79	-27.12	-28.87	41.48	-
Dianthus carthusianorum	p0506	contemporary	2024	50.1752	19.8491	-2.21	2.8	-29.43	-29.43	44.7	0.66
Dianthus carthusianorum	p0506	historical	1926	50.1697	19.8561	1.51	1.61	-28.22	-29.83	42.72	-
Dianthus carthusianorum	p0507	contemporary	2024	52.344	20.5593	-0.94	3.05	-30.06	-30.06	45.04	0.35
Dianthus carthusianorum	p0507	historical	1924	52.3453	20.5778	-3.72	3.15	-29.6	-31.21	44.72	-
Dianthus carthusianorum	p0508	contemporary	2024	50.3779	20.7167	-3.92	1.92	-29.3	-29.3	44.08	0.83
Dianthus carthusianorum	p0508	historical	1933	50.3781	20.7161	-0.92	2.1	-28.75	-30.35	44.62	-
Dianthus carthusianorum	p0509	contemporary	2024	51.4004	21.983	-4.49	2.13	-28.71	-28.71	43.58	0.38
Dianthus carthusianorum	p0509	historical	~1865	51.4164	21.9692	-1.55	2.81	-26.33	-28.17	43.12	-
Dianthus carthusianorum	p8120	contemporary	2024	54.0196	22.9921	-0.59	2.22	-28.47	-28.47	43.46	0.47
Dianthus carthusianorum	p8120	historical	1921	54.0225	22.9883	3.1	1.68	-28.13	-29.74	42.3	-
Elodea canadensis	p1101	contemporary	2024	54.2828	22.8182	3.3	4.71	-22.75	-22.75	41.24	0.76
Elodea canadensis	p1101	historical	1934	54.27	22.8144	-3.36	4.13	-16.35	-17.94	37.21	-
Elodea canadensis	p1102	contemporary	2024	51.4335	21.9453	4.79	3.93	-31.76	-31.76	40.9	0.45
Elodea canadensis	p1102	historical	~1887	51.4164	21.9692	5.27	4.49	-22.94	-24.73	34.27	-
Elodea canadensis	p1103	contemporary	2024	52.4368	19.9251	4.39	4.5	-30.92	-30.92	39.24	0.69
Elodea canadensis	p1103	historical	1896	52.4317	19.9039	4.85	1.94	-18.15	-19.91	33.96	-
Elodea canadensis	p1104	contemporary	2024	52.3484	20.2609	3.19	3.8	-36.72	-36.72	39.11	0.6
Elodea canadensis	p1104	historical	1922	52.3864	20.5883	-0.96	3.6	-12.36	-13.97	40.71	-
Elodea canadensis	p1105	contemporary	2024	52.6429	21.9052	-2.4	3.45	-27.7	-27.7	35.47	0.5
Elodea canadensis	p1105	historical	1893	52.6694	21.9461	5.09	2.81	-19.33	-21.09	30.5	-
Elodea canadensis	p1107	contemporary	2024	52.6793	19.4978	9.81	4.81	-31.66	-31.66	37.84	0.83
Elodea canadensis	p1107	historical	1926	52.4497	19.4439	4.13	3.12	-37.66	-39.27	35.67	-
Elodea canadensis	p1108	contemporary	2024	52.1462	21.0953	11.17	4.88	-35.12	-35.12	38.37	0.28
Elodea canadensis	p1108	historical	1882	52.1728	21.1	6.47	3.36	-19.23	-21.04	32.78	-
Erysimum spp.	p0601	contemporary	2024	49.4349	20.3125	-4.09	2.82	-29.82	-29.82	41.47	0.38
Erysimum spp.	p0601	historical	~1855	49.4228	20.4828	0.8	3.6	-27.86	-29.73	40.17	-
Erysimum spp.	p0602	contemporary	2024	50.2993	19.5938	-1.21	3.28	-29.35	-29.35	41.45	0.36
Erysimum spp.	p0602	historical	1922	50.3356	19.5625	4.5	3.31	-24.33	-25.94	39.58	-
Erysimum spp.	p0603	contemporary	2024	50.7492	19.2747	-3.15	2.28	-27.81	-27.81	42.23	0.48
Erysimum spp.	p0603	historical	1874	50.7503	19.2675	6.16	3.43	-26.27	-28.09	38.39	-
Erysimum spp.	p0604	contemporary	2024	50.3779	20.7167	0.41	3.37	-28.96	-28.96	39.61	0.83
Erysimum spp.	p0604	historical	1935	50.3789	20.7158	2.46	6.79	-26.92	-28.5	40.79	-
Erysimum spp.	p0605	contemporary	2024	50.7654	19.2705	0.4	3.37	-29.29	-29.29	40.62	0.51
Erysimum spp.	p0605	historical	1875	50.7772	19.2733	2.94	3.5	-26.34	-28.16	39.17	-
Nymphaea alba	p1201	contemporary	2024	52.3615	20.8757	2.26	3.38	-31.51	-31.51	39.42	0.22
Nymphaea alba	p1201	historical	1905	52.3336	20.8869	2.41	2.52	-23.07	-24.78	41.63	-
Nymphaea alba	p1202	contemporary	2024	54.0183	23.0184	6.62	4.1	-27.87	-27.87	41.64	0.34
Nymphaea alba	p1202	historical	1921	54.0164	23.0758	6.49	3.05	-24.95	-26.56	42.94	-
Nymphaea alba	p1203	contemporary	2024	52.5112	18.3339	2.35	2.68	-26.15	-26.15	43.94	0.8
Nymphaea alba	p1203	historical	1921	52.5167	18.3206	2.53	3.86	-22.59	-24.2	43.86	-
Nymphaea alba	p1204	contemporary	2024	52.6781	21.9064	-0.22	1.84	-24.79	-24.79	40.67	0.51
Nymphaea alba	p1204	historical	1893	52.6694	21.9461	-0.76	3.53	-23.01	-24.77	44.48	-
Nymphaea alba	p1206	contemporary	2024	52.3648	20.2335	8.5	2.36	-24.53	-24.53	43.57	0.63
Nymphaea alba	p1206	historical	1905	52.6781	21.2742	5.19	3.33	-23.75	-25.46	41.82	-
Nymphaea alba	p1207	contemporary	2024	51.5278	21.8559	-0.05	3.5	-28.52	-28.52	42.65	0.48
Nymphaea alba	p1207	historical	1887	51.4164	21.9692	-2.9	3.21	-22.2	-23.99	41.45	-
Sagittaria sagittifolia	p1401	contemporary	2024	51.4241	21.9472	12.16	5.37	-28.92	-28.92	43.44	0.46
Sagittaria sagittifolia	p1401	historical	~1865	51.4164	21.9692	6.35	4.09	-24.86	-26.7	43.15	-
Sagittaria sagittifolia	p1402	contemporary	2024	52.6793	19.4978	7.92	4.19	-30.84	-30.84	43.08	0.83
Sagittaria sagittifolia	p1402	historical	1885	52.6744	19.54	4.47	3.42	-26.25	-28.05	44.82	-
Sagittaria sagittifolia	p1403	contemporary	2024	52.1053	23.4733	9.14	4.39	-28.92	-28.92	44.21	0.59
Sagittaria sagittifolia	p1403	historical	1888	52.1653	23.4364	6.04	4.61	-25.91	-27.69	43.81	-
Sagittaria sagittifolia	p1404	contemporary	2024	52.9032	21.4077	4.41	4.2	-28.11	-28.11	42.49	0.58
Sagittaria sagittifolia	p1404	historical	1909	52.8872	21.3908	9.43	5.97	-24.11	-25.78	45.7	-
Sagittaria sagittifolia	p1405	contemporary	2024	52.3615	20.8757	3.55	3.94	-31.45	-31.45	41.94	0.22
Sagittaria sagittifolia	p1405	historical	1905	52.3336	20.8869	4.63	4.61	-30.41	-32.12	44.38	-
Sagittaria sagittifolia	p1406	contemporary	2024	53.3544	19.3887	1.49	3.97	-31.45	-31.45	42.16	0.46
Sagittaria sagittifolia	p1406	historical	1931	53.3014	19.4597	4.31	4.41	-27.13	-28.73	43.5	-
Sagittaria sagittifolia	p1407	contemporary	2024	50.8308	19.2902	9.11	4.34	-29.23	-29.23	42.87	0.63
Sagittaria sagittifolia	p1407	historical	1877	50.8117	19.1203	4.66	6.25	-27.1	-28.91	45.62	-
Sagittaria sagittifolia	p1408	contemporary	2024	52.7029	21.9057	16.28	4.39	-28.51	-28.51	43.05	0.5
Sagittaria sagittifolia	p1408	historical	1937	52.6972	21.8469	6.42	4.48	-27.17	-28.74	43.16	-
Silene otites	p0701	contemporary	2024	52.3159	20.7515	-3.84	4.47	-30.36	-30.36	46.25	0.41
Silene otites	p0701	historical	1924	52.3331	20.5833	1.32	4.45	-27.17	-28.78	42.11	-
Silene otites	p0703	contemporary	2024	52.3907	22.7216	-1.32	3.14	-27.27	-27.27	43.66	0.69
Silene otites	p0703	historical	1873	52.3925	22.7258	4.28	1.64	-26.8	-28.62	41.59	-
Silene otites	p0704	contemporary	2024	50.7988	19.1998	0.05	3.19	-28.33	-28.33	45.33	0.46
Silene otites	p0704	historical	1879	50.8117	19.1203	2.29	3.07	-26.07	-27.88	43.77	-
Silene otites	p0706	contemporary	2024	50.6997	19.4509	0.65	3.24	-27.86	-27.86	44.49	0.42
Silene otites	p0706	historical	1922	50.7067	19.4375	0.78	2.58	-26.34	-27.95	43.71	-
Silene otites	p0707	contemporary	2024	52.8179	18.9063	-2.51	4.01	-29.01	-29.01	43.88	0.53
Silene otites	p0707	historical	1905	52.82	18.9047	-1.32	3.2	-25.78	-27.49	42.06	-
Silene otites	p0708	contemporary	2024	52.344	20.5593	-4.61	4.65	-29.4	-29.4	42.83	0.35
Silene otites	p0708	historical	1924	52.3439	20.7128	7.64	2.7	-27.14	-28.75	43.68	-
Silene otites	p0709	contemporary	2024	50.3779	20.7167	-2.51	4.32	-30	-30	45.86	0.83
Silene otites	p0709	historical	1934	50.3789	20.7158	1.75	2.05	-27.04	-28.63	43.38	-
Silene otites	p0710	contemporary	2024	50.8605	20.5625	0.69	3.29	-29.13	-29.13	43.35	0.38
Silene otites	p0710	historical	1889	50.8589	20.6425	3	3.12	-25.91	-27.69	39.54	-
Silene otites	p0711	contemporary	2024	50.7492	19.2747	1.37	4.11	-28.24	-28.24	45.54	0.48
Silene otites	p0711	historical	1878	50.7503	19.2675	2.13	2.57	-27.43	-29.24	42.56	-
Stuckenia pectinata	p1301	contemporary	2024	52.3633	20.2325	15.55	3.31	-32.25	-32.25	39.2	0.63
Stuckenia pectinata	p1301	historical	1923	52.3628	20.2742	9.58	3.06	-28.41	-30.02	33.39	-
Stuckenia pectinata	p1302	contemporary	2024	53.0609	18.9254	11.57	4.29	-26.89	-26.89	39.48	0.7
Stuckenia pectinata	p1302	historical	1889	53.0553	18.9264	5.33	3.31	-21.51	-23.29	35.32	-
Stuckenia pectinata	p1303	contemporary	2024	54.2828	22.8182	2.98	2.1	-14.33	-14.33	36.1	0.76
Stuckenia pectinata	p1303	historical	1934	54.27	22.8144	-1.09	2.16	-12.36	-13.95	38.89	-
Stuckenia pectinata	p1304	contemporary	2024	50.7976	19.5227	9.71	4.59	-42.17	-42.17	42.35	0.52
Stuckenia pectinata	p1304	historical	1922	50.7067	19.4375	2.43	3.65	-25.02	-26.63	38.25	-
Stuckenia pectinata	p1305	contemporary	2024	51.442	22.0046	8.14	4.19	-27.18	-27.18	37.19	0.46
Stuckenia pectinata	p1305	historical	1863	51.4164	21.9692	5.87	2.17	-20.4	-22.24	35.84	-
Stuckenia pectinata	p1306	contemporary	2024	51.1902	23.7715	-0.29	2.14	-22.6	-22.6	37.72	0.44
Stuckenia pectinata	p1306	historical	~1930	51.5517	23.5542	6.37	2.77	-20.93	-22.53	38.8	-
Stuckenia pectinata	p1307	contemporary	2024	52.7029	21.9057	16.56	2.99	-32.88	-32.88	37.24	0.5
Stuckenia pectinata	p1307	historical	1893	52.6694	21.9461	2.18	1.8	-15.19	-16.95	38.1	-
Stuckenia pectinata	p1308	contemporary	2024	52.1612	21.0583	6.89	4.16	-36.15	-36.15	38.07	0.26
Stuckenia pectinata	p1308	historical	1890	52.2042	21.0572	8.67	3.45	-16.66	-18.43	38.36	-
