# Supplementary material for: Contrasting isotopic responses of dryland and wetland plants to a century of global anthropogenic changes in nutrient cycling
Source: Copernicus journal article supplement (doi:10.5194/egusphere-2025-5959), 2026-01-05

d13C (‰)

d15N (‰)

TN (%)

Mean difference

0.6

0.4

0.2

0.0

-0.2

*Elodea.canadensis**Stuckenia.pectinata**Elodea.canadensis**Stuckenia.pectinata**Elodea.canadensis**Stuckenia.pectinata*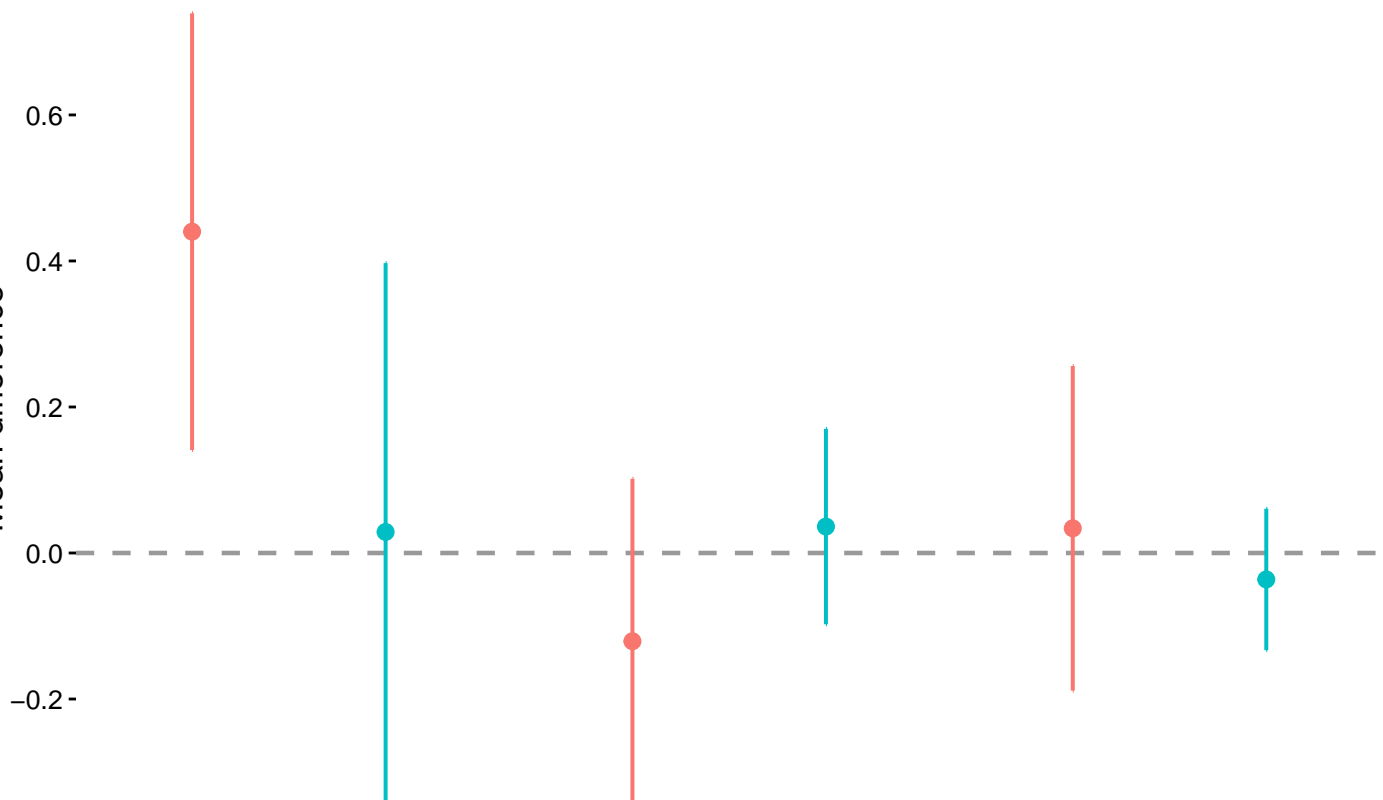

Supplement: Supplementary file [file egusphere-2025-5959-AC3-supplement.pdf]
